# Supplementary material for: Comprehensive Analysis of Seasonal and Geographical Variation in UVB Radiation Relevant for Vitamin D Production in Europe
Source: MDPI journal article supplement (doi:10.3390/nu14235189), 2022-12-06
Supplement: s1 [file s1]

# Comprehensive Analysis of Seasonal and Geographical Variation in UVB Radiation Relevant for Vitamin D Production in Europe

Tarinee Khanna <sup>1,†</sup>, Rasha Shraim <sup>1,2,†</sup>, Masa Zarkovic <sup>1,3</sup>, Michiel van Weele <sup>4</sup>, Jos van Geffen <sup>4</sup> and Lina Zgaga <sup>1,\*</sup>

**Table S1.** Capital Cities in Europe and their latitude and longitude, sorted according to their latitude. Negative Longitude numbers represent West (e.g.  $-5^{\circ}$  E=  $5^{\circ}$  W).

| City             | Country              | Longitude | Latitude |
|------------------|----------------------|-----------|----------|
| Nicosia          | Cyprus               | 33.38     | 35.19    |
| Valletta         | Malta                | 14.51     | 36.90    |
| Athens           | Greece               | 23.73     | 37.98    |
| Lisbon           | Portugal             | -9.15     | 38.77    |
| Ankara           | Turkey               | 32.88     | 39.95    |
| Madrid           | Spain                | -3.70     | 40.42    |
| Tirana           | Albania              | 19.82     | 41.33    |
| Rome             | Italy                | 12.52     | 41.90    |
| Skopje           | Macedonia            | 21.43     | 42.00    |
| Podgorica        | Montenegro           | 19.26     | 42.43    |
| Andorra la Vella | Andorra              | 1.52      | 42.51    |
| Pristina         | Kosovo               | 21.17     | 42.67    |
| Sofia            | Bulgaria             | 23.32     | 42.70    |
| Monaco           | Monaco               | 7.42      | 43.74    |
| Sarajevo         | Bosnia & Herzegovina | 18.41     | 43.86    |
| San Marino       | San Marino           | 12.46     | 43.94    |
| Bucharest        | Romania              | 26.10     | 44.43    |
| Belgrade         | Serbia               | 20.45     | 44.79    |
| Zagreb           | Croatia              | 15.98     | 45.82    |
| Ljubljana        | Slovenia             | 14.51     | 46.06    |
| Bern             | Switzerland          | 7.45      | 46.95    |
| Chisinau         | Moldova              | 28.86     | 47.01    |
| Vaduz            | Liechtenstein        | 9.52      | 47.14    |
| Budapest         | Hungary              | 19.04     | 47.50    |
| Bratislava       | Slovakia             | 17.11     | 48.15    |
| Vienna           | Austria              | 16.35     | 48.23    |
| Paris            | France               | 2.34      | 48.85    |
| Luxembourg       | Luxembourg           | 6.13      | 49.61    |
| Prague           | Czech Republic       | 14.44     | 50.08    |
| Kiev             | Ukraine              | 30.52     | 50.45    |
| Brussels         | Belgium              | 4.36      | 50.80    |
| London           | Great Britain        | -0.12     | 51.50    |
| Warsaw           | Poland               | 21.01     | 52.23    |
| Amsterdam        | Netherlands          | 4.90      | 52.37    |
| Berlin           | Germany              | 13.41     | 52.52    |
| Dublin           | Ireland              | -6.25     | 53.33    |
| Minsk            | Belarus              | 27.56     | 53.90    |

---

|            |           |        |       |
|------------|-----------|--------|-------|
| Vilnius    | Lithuania | 25.28  | 54.69 |
| Copenhagen | Denmark   | 12.57  | 55.68 |
| Moscow     | Russia    | 37.50  | 55.70 |
| Riga       | Latvia    | 24.11  | 56.95 |
| Stockholm  | Sweden    | 18.08  | 59.33 |
| Tallinn    | Estonia   | 24.75  | 59.44 |
| Oslo       | Norway    | 10.72  | 59.94 |
| Helsinki   | Finland   | 24.94  | 60.17 |
| Reykjavik  | Iceland   | -21.82 | 64.13 |

---

Table S2. Summary of the retrieved studies reporting monthly 25(OH)D.

| Study ID           | Group    | Reference               | Participants                                                                                                                                               |
|--------------------|----------|-------------------------|------------------------------------------------------------------------------------------------------------------------------------------------------------|
| Denmark            | healthy  | Brot et al. 2001        | 2,016 healthy Danish perimenopausal women aged 45–58                                                                                                       |
| EPIC               | healthy  | Roddan et al. 2007      | 730 incident fracture cases and 1,445 matched controls from the EPIC-Oxford study (mean age: 51 (men) and 53 (women))                                      |
| Faroe Islands      | healthy  | Dalgard et al. 2010     | 713 elderly Faroese aged 70–74 years                                                                                                                       |
| Ireland            | healthy  | O'Neill et al. 2016     | Irish adults (aged 18–84 years) from the nationally representative study                                                                                   |
| Sweden             | healthy  | Michaelsson et al. 2017 | 5,002 older women (mean age: 68 years) randomly selected from a large population-based cohort study                                                        |
| Sweden 2           | healthy  | Klingberg et al. 2015   | healthy Swedish adult population; 540 blood donors (60% men; mean age: 41±13 years) and 75 thrombocyte donors (92% men, aged 46±11 years)                  |
| Switzerland        | healthy  | Guessour et al. 2012    | 1,309 subjects from a population-based study (age: 48.8±18.2, 48.7% male)                                                                                  |
| UK2                | healthy  | Webb et al. 2010        | 125 white adults aged 20–60                                                                                                                                |
| UKBB               | healthy  | UK Biobank dataset      | 443,842 participants (age: 57±8; 46.4% male)                                                                                                               |
| Germany            | diseased | Noe et al. 2017         | 625 HIV-infected patients (81% male, median age: 47 years)                                                                                                 |
| Greece             | diseased | Papadakis et al. 2015   | population-based cohort of post-menopausal women with osteoporosis (mean age: 65.3 years)                                                                  |
| Italy              | diseased | Calgani et al. 2016     | 95 male urologic patients (mean age: 66 years; dominant conditions: benign prostate hypertrophy and prostate carcinoma)                                    |
| Cyprus             | lab      | Xyda et al. 2022        | data from 8780 Greek and 2594 Cypriot individuals (January 2013–October 2017) who had their 25(OH)D measured in two laboratories                           |
| Greece 2           | lab      |                         |                                                                                                                                                            |
| Romania            | lab      | Niculescu et al. 2017   | 8,024 measurements from endocrinology center database (2012–2016), in individuals without a diagnosis of low bone mass                                     |
| Turkey             | lab      | Solak et al.            | the data of 39,107 patients who were admitted to hospital for any reason (January 1, 2016 to December 31, 2016) and whose serum 25(OH)D conc. was measured |
| Ukraine (A and Ch) | lab      | Shchubelka 2020         | 1,639 adult and 184 children, randomly selected among those whose serum concentration of 25(OH) D was recorded in 2019 at the medical laboratory center    |

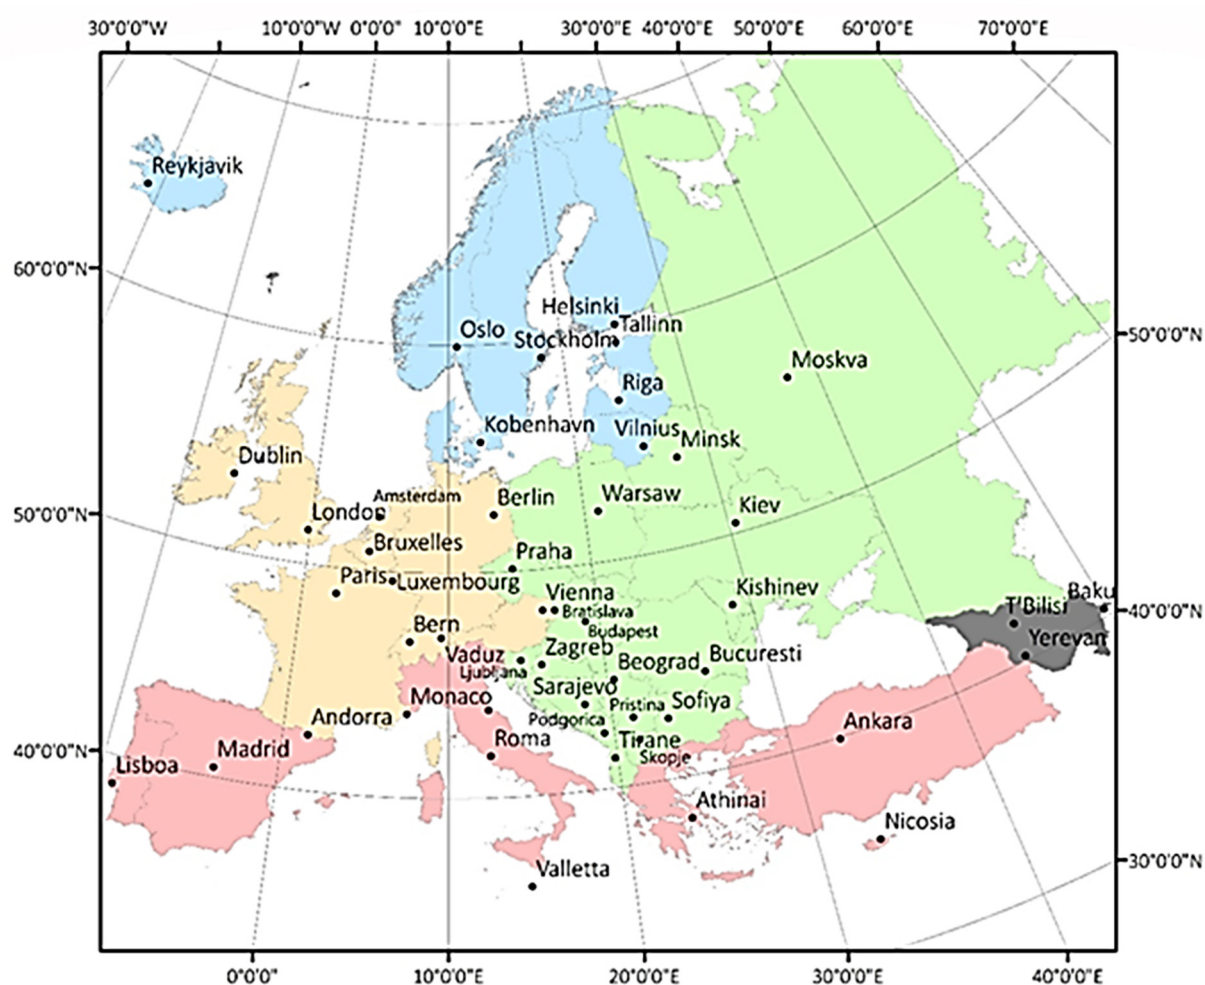

1:29,038,647

### EU Regions

- Not categorised in data
- Eastern Europe
- Northern Europe
- Southern Europe
- Western Europe

Figure S1. European countries and their capitals included in this study.

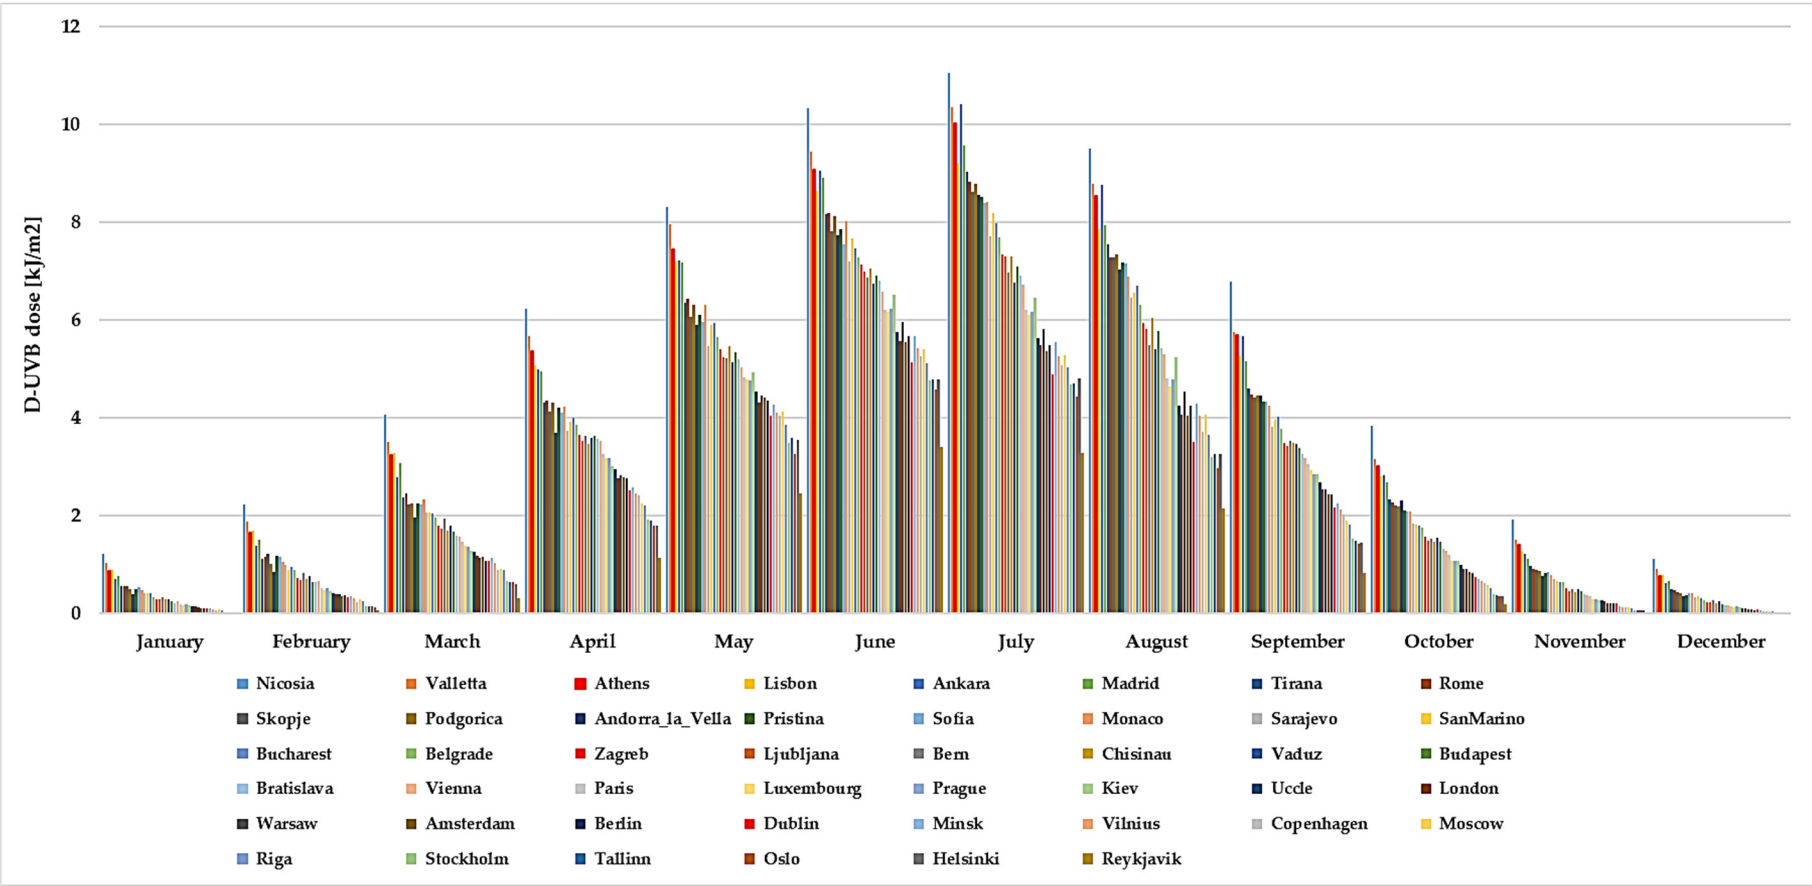

Figure S2. Mean daily D-UVB in European capital cities for each month of the year.

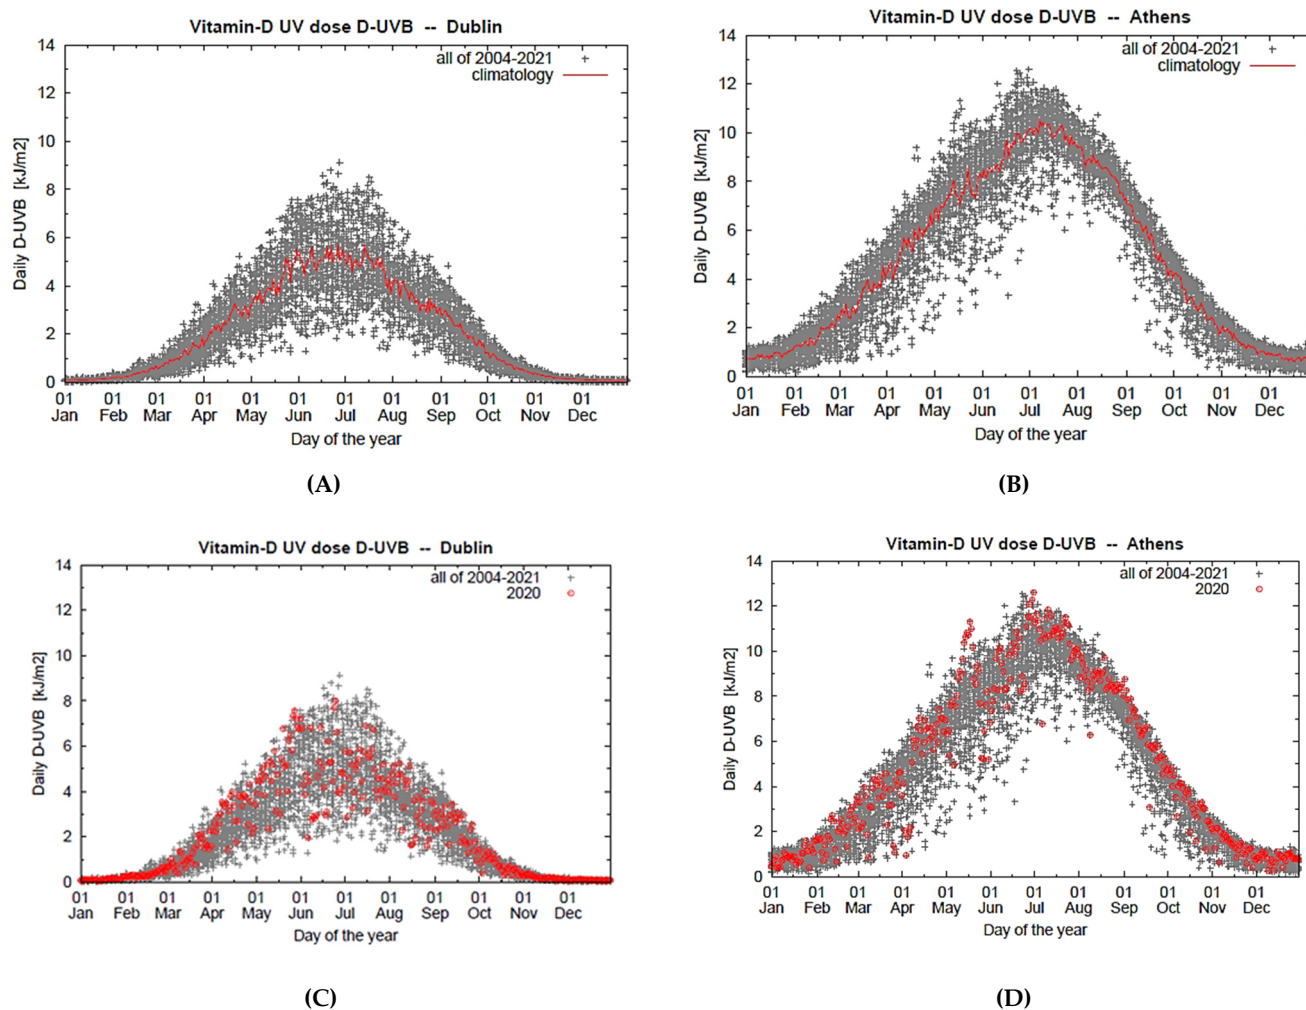

**Figure S3.** All measured diurnal D-UVB doses (2004–2021) for Dublin (A) and Athens (B) are shown, alongside the average D-UVB over the same period (in red). Diurnal D-UVB doses for 2020 only are shown in red, alongside all measured diurnal D-UVB values (2004–2021) for Dublin (C) and Athens (D).
